# Supplementary material for: Meningeal lymphatic drainage promotes T cell responses against Toxoplasma gondii but is dispensable for parasite control in the brain
Source: eLife. 2022 Dec 21;11:e80775. doi: 10.7554/eLife.80775 (PMC9812409; doi:10.7554/eLife.80775)
Supplement: Figure 2—source data 1. [file elife-80775-fig2-data1.xlsx]

## Sheet: Sheet1
Timepoint	Timecourse	Sample	Tissue	Total Live Cells	TCRbeta freq	CD4 freq	CD44+CD62L- freq	Number of CD44+CD62L- CD4+ T cells			Notes
2 wpi	1	Infected 1	DCLN	362500	24.7	45.5	27.6	11244.1			Blanks = lymph nodes could not be identified for dissection and were excluded from analysis
2 wpi	1	Infected 2	DCLN	587500	24.9	45.3	24.3	16103.2
2 wpi	1	Infected 3	DCLN	612500	25.1	41.3	32.7	20762.4
2 wpi	1	Infected 4	DCLN	837500	20.7	45.9	35.4	28169
2 wpi	1	Infected 5	DCLN	550000	20.9	44	39.3	19877.2
2 wpi	1	Infected 6	DCLN	312500	23.4	44.5	39.5	12853.5
2 wpi	1	Naïve 1	DCLN	487500	62.7	50.1	12.6	19295.3
2 wpi	1	Naïve 2	DCLN
2 wpi	1	Naïve 3	DCLN	200000	60.9	54	11.5	7563.78
2 wpi	1	Naïve 4	DCLN	337500	66.4	50.7	12.8	14543.2
2 wpi	2	Infected 1	DCLN	403000	24.4	46.1	39.4	17860.4
2 wpi	2	Infected 2	DCLN	600000	23.4	46	33.9	21894
2 wpi	2	Infected 3	DCLN	420000	19.8	45.3	24.7	9304.86
2 wpi	2	Infected 4	DCLN	246750	24.2	43.1	39.6	10191.7
2 wpi	2	Naïve 1	DCLN	378000	63.1	53.5	8.67	11063.5
2 wpi	2	Naïve 2	DCLN	391000	56.5	52	9.67	11108.5
2 wpi	2	Naïve 3	DCLN	212500	60	51.4	8.53	5590.14
3 wpi	1	Infected 1	DCLN	330000	22.8	33.2	25.8	6444.76
3 wpi	1	Infected 2	DCLN	2.04e+06	22.8	36.6	33	56177.2
3 wpi	1	Infected 3	DCLN	690000	23.6	32.3	45	23668.8
3 wpi	1	Infected 4	DCLN	195000	24	33.1	28.5	4414.88
3 wpi	1	Infected 5	DCLN	240000	21.1	36.5	39.4	7282.54
3 wpi	1	Infected 6	DCLN	300000	21.7	36.6	33.1	7886.6
3 wpi	1	Naïve 1	DCLN	705000	67.3	46.9	5.8	12906.4
3 wpi	1	Naïve 2	DCLN	195000	56	53.8	16.7	9811.18
3 wpi	1	Naïve 3	DCLN	80000	66.1	48.5	9.97	2556.99
3 wpi	3	Infected 1	DCLN	1.792e+06	23.5	39.9	41.7	70067.2
3 wpi	3	Infected 2	DCLN	2.28e+06	24.2	44.5	46	112945
3 wpi	3	Infected 3	DCLN	638000	26.1	38	47.9	30309.6
3 wpi	3	Infected 4	DCLN	456000	43.9	25	42.9	21469.7
3 wpi	3	Naïve 1	DCLN	935000	67.3	52.6	14.9	49317.2
3 wpi	3	Naïve 2	DCLN	42000	54.4	55.6	9.79	1243.67
3 wpi	3	Naïve 3	DCLN	185250	61	57.2	11.9	7691.85
6 wpi	1	Infected 1	DCLN	2380000	16.4	44.2	44	75909.4
6 wpi	1	Infected 2	DCLN	1155000	57.9	49.6	12.6	41793.9
6 wpi	1	Infected 3	DCLN	1.015e+06	22.8	34.4	29.1	23166.1
6 wpi	1	Infected 4	DCLN	3.712e+06	19.1	42.6	29.5	89099
6 wpi	1	Infected 5	DCLN	1798000	20.8	42.3	48.6	76882.9
6 wpi	1	Infected 6	DCLN	1.904e+06	23	45.1	41.6	82160.8
6 wpi	1	Naïve 1	DCLN	224000	60.2	47.5	8.93	5719.92
6 wpi	1	Naïve 2	DCLN	1026000	13.1	48.5	8.47	5521.33
6 wpi	1	Naïve 3	DCLN	309333	56.4	45.7	12	9567.61
6 wpi	1	Naïve 4	DCLN	1798000	28	47.6	7.67	18380.2
6 wpi	2	Infected 1	DCLN	3068000	22.4	47.7	49.7	162921
6 wpi	2	Infected 2	DCLN	2592000	22.7	42.3	24.3	60479.4
6 wpi	2	Infected 3	DCLN	784000	20.9	45.7	53.2	39837.3
6 wpi	2	Infected 4	DCLN	1428000	23.5	43.2	54.2	78574
6 wpi	2	Naïve 1	DCLN	126000	51.5	52.2	12.6	4267.95
6 wpi	2	Naïve 2	DCLN
6 wpi	2	Naïve 3	DCLN	3068000	39.1	52.3	15	94107.7
6 wpi	3	Infected 1	DCLN	1.392e+06	22.6	43.7	48.7	66951.2
6 wpi	3	Infected 2	DCLN	4466000	20	40.9	32.2	117633
6 wpi	3	Infected 3	DCLN	2552000	18.4	42.9	47.3	95283.3
6 wpi	3	Infected 4	DCLN	1334000	21.3	47.7	52.6	71291.8
6 wpi	3	Naïve 1	DCLN	191750	55.5	53.5	19.8	11273.2
6 wpi	3	Naïve 2	DCLN
6 wpi	3	Naïve 3	DCLN	420500	55.3	55.6	17.7	22884.4
8 wpi	1	Infected 1	DCLN	567000	21.5	44.2	27	14548.1
8 wpi	1	Infected 2	DCLN	675000	19.2	42.8	43.3	24018
8 wpi	1	Infected 3	DCLN	2565000	22.1	48.6	36.3	100005
8 wpi	1	Infected 4	DCLN	855000	23	43.7	36.9	31710.4
8 wpi	1	Infected 5	DCLN	770000	26.9	39.7	46.5	38237.2
8 wpi	1	Infected 6	DCLN	348000	44.1	54.6	5.01	4198.06
8 wpi	1	Naïve 1	DCLN	224000	66.3	49.4	7.25	5318.96
8 wpi	1	Naïve 2	DCLN	3819000	71.1	61	2.06	34120.6
8 wpi	1	Naïve 3	DCLN	42750	59.8	52.5	18.6	2496.37
8 wpi	1	Naïve 4	DCLN	60000	45.8	45.4	21.7	2707.27
8 wpi	2	Infected 1	DCLN	2600000	21.5	46.3	41.5	107409
8 wpi	2	Infected 2	DCLN	2640000	17.9	49	46.8	108367
8 wpi	2	Infected 3	DCLN	3.762e+06	19.4	48.7	42.7	151767
8 wpi	2	Infected 4	DCLN	3604000	20.6	49.3	38.5	140916
8 wpi	2	Naïve 1	DCLN	143000	61.7	53.4	14.6	6878.84
8 wpi	2	Naïve 2	DCLN	432000	62.5	52.6	14.8	21019
8 wpi	2	Naïve 3	DCLN	459000	61.2	52.2	11.3	16569.6
8 wpi	3	Infected 1	DCLN	6.48e+06	17.2	48.6	50.4	273005
8 wpi	3	Infected 2	DCLN	1350000	18.8	45.6	40.7	47103.2
8 wpi	3	Infected 3	DCLN	2214000	17.5	43.9	45.9	78071.6
8 wpi	3	Infected 4	DCLN	1320000	20.6	50.7	38.7	53353.2
8 wpi	3	Naïve 1	DCLN	583000	59.3	51.2	16.8	29737.4
8 wpi	3	Naïve 2	DCLN	206250	51.2	49.5	16.6	8677.15
8 wpi	3	Naïve 3	DCLN	936000	41.6	46.9	19.1	34879.9
2 wpi	1	Infected 1	ILN	6000000	22.1	40.5	35	187961
2 wpi	1	Infected 2	ILN	10600000	25.3	41.5	32.6	362821
2 wpi	1	Infected 3	ILN	4600000	25.8	39.7	32.2	151713
2 wpi	1	Infected 4	ILN	3300000	25	40.3	32.5	108054
2 wpi	1	Infected 5	ILN	7100000	25.5	41.3	34.2	255726
2 wpi	1	Infected 6	ILN	4300000	23.7	39	35.3	140299
2 wpi	1	Naïve 1	ILN	2900000	60.2	52.9	10.1	93276.3
2 wpi	1	Naïve 2	ILN	4800000	64.7	49.9	8.44	130794
2 wpi	1	Naïve 3	ILN	3200000	63.1	52.4	9.5	100516
2 wpi	1	Naïve 4	ILN	1700000	65.8	53.5	8.62	51586.5
2 wpi	2	Infected 1	ILN	10800000	21	43.8	31.1	308942
2 wpi	2	Infected 2	ILN	12300000	21.5	38.1	26.6	268009
2 wpi	2	Infected 3	ILN	8500000	24.4	40.8	21.1	178547
2 wpi	2	Infected 4	ILN	9700000	25.9	39.4	30.6	302893
2 wpi	2	Naïve 1	ILN	4300000	58.7	51.5	7.52	97753.3
2 wpi	2	Naïve 2	ILN	4700000	59.4	53.4	8.34	124334
2 wpi	2	Naïve 3	ILN	2200000	56.2	51.9	8.56	54928.8
3 wpi	1	Infected 1	ILN	1250000	29	40.2	31.4	45757.7
3 wpi	1	Infected 2	ILN	4400000	26.6	41.7	32.8	160083
3 wpi	1	Infected 3	ILN	2400000	31	34.9	40.4	104901
3 wpi	1	Infected 4	ILN	2150000	34.2	38.4	29.5	83294.8
3 wpi	1	Infected 5	ILN	1050000	35.7	41.8	32.3	50610
3 wpi	1	Infected 6	ILN	2500000	26.2	39	30	76635
3 wpi	1	Naïve 1	ILN	1350000	67	48.5	8.72	38253.1
3 wpi	1	Naïve 2	ILN	1650000	59.6	51.6	10.8	54802.9
3 wpi	1	Naïve 3	ILN	2000000	59.5	52.3	8.93	55577.6
3 wpi	3	Infected 1	ILN	6900000	30.1	42.3	36.5	320663
3 wpi	3	Infected 2	ILN
3 wpi	3	Infected 3	ILN	1225000	36	41.8	45.1	83136.4
3 wpi	3	Infected 4	ILN	700000	37.1	35.7	47.1	43667.8
3 wpi	3	Naïve 1	ILN	2900000	63.6	50.4	9.61	89332.4
3 wpi	3	Naïve 2	ILN	5100000	55.9	48.6	12.4	171807
3 wpi	3	Naïve 3	ILN	6400000	57.8	53.1	9.89	194267
6 wpi	1	Infected 1	ILN	3100000	24	46.6	30.3	105051
6 wpi	1	Infected 2	ILN	1950000	32.6	36.5	34.1	79122.4
6 wpi	1	Infected 3	ILN	1400000	27.6	43.2	36.7	61261.4
6 wpi	1	Infected 4	ILN	800000	36.2	44.1	26.6	33971.8
6 wpi	1	Infected 5	ILN	2900000	23.9	40.8	39.6	111983
6 wpi	1	Infected 6	ILN	2200000	20.9	54	38.3	95095.8
6 wpi	1	Naïve 1	ILN	2650000	62.9	51.2	6.63	56582.2
6 wpi	1	Naïve 2	ILN	1350000	61.6	51.6	9.43	40464.7
6 wpi	1	Naïve 3	ILN	5900000	62.6	49.5	8.05	147173
6 wpi	1	Naïve 4	ILN	5400000	64.8	51.7	7.47	135139
6 wpi	2	Infected 1	ILN	5900000	25	43.4	36.8	235575
6 wpi	2	Infected 2	ILN	2800000	33.2	49.4	23.1	106080
6 wpi	2	Infected 3	ILN	9400000	22.4	39.7	50	417962
6 wpi	2	Infected 4	ILN	2250000	29.5	42.5	42.4	119608
6 wpi	2	Naïve 1	ILN	7100000	54.8	46.3	7.78	140152
6 wpi	2	Naïve 2	ILN	2350000	57.5	49.7	10.3	69171.8
6 wpi	2	Naïve 3	ILN	3700000	57.7	49.6	9.46	100173
6 wpi	3	Infected 1	ILN	2600000	23.1	50	52.8	158558
6 wpi	3	Infected 2	ILN	4500000	27.5	41.5	28.8	147906
6 wpi	3	Infected 3	ILN	4000000	29.4	39.6	34.5	160665
6 wpi	3	Infected 4	ILN	4700000	21.6	44.8	46.8	212851
6 wpi	3	Naïve 1	ILN	3200000	59.8	49.8	13.6	129604
6 wpi	3	Naïve 2	ILN	2700000	61.1	50.9	10.5	88168.2
6 wpi	3	Naïve 3	ILN	1000000	58.3	50.3	14.4	42227.9
8 wpi	1	Infected 1	ILN	1100000	33.9	52.7	21	41268.8
8 wpi	1	Infected 2	ILN	575000	34.7	48.7	27.2	26429.9
8 wpi	1	Infected 3	ILN	2500000	27.3	47.1	24.2	77792.7
8 wpi	1	Infected 4	ILN	575000	33.9	45.4	34.1	30177.1
8 wpi	1	Infected 5	ILN	1600000	35.5	38.9	35	77333.2
8 wpi	1	Infected 6	ILN	2800000	31.5	44.5	29.3	115000
8 wpi	1	Naïve 1	ILN	3500000	49.3	53.7	9.78	90620.8
8 wpi	1	Naïve 2	ILN	2400000	46.9	52	14.7	86040.9
8 wpi	1	Naïve 3	ILN	3300000	41.9	49.7	8.47	58206
8 wpi	1	Naïve 4	ILN	625000	50.7	47.3	16	23981.1
8 wpi	2	Infected 1	ILN	6900000	25.9	44	36.1	283863
8 wpi	2	Infected 2	ILN	6700000	29.7	43.8	35.3	307666
8 wpi	2	Infected 3	ILN	8700000	23.6	47.3	45.1	437995
8 wpi	2	Infected 4	ILN	6400000	33.8	50.7	24.9	273089
8 wpi	2	Naïve 1	ILN	8400000	54.8	51.9	9.94	237473
8 wpi	2	Naïve 2	ILN	5100000	60.7	49	12.1	183544
8 wpi	2	Naïve 3	ILN	5800000	60.3	49	9.46	162118
8 wpi	3	Infected 1	ILN	2300000	25.9	47.5	39.9	112900
8 wpi	3	Infected 2	ILN	6300000	29.1	46.4	32.3	274760
8 wpi	3	Infected 3	ILN	10600000	24.8	39.8	32.9	344220
8 wpi	3	Infected 4	ILN	7400000	29.1	48.2	31.1	322799
8 wpi	3	Naïve 1	ILN	2800000	67.5	49.6	11.5	107806
8 wpi	3	Naïve 2	ILN	2600000	65.9	48.7	10.5	87614.7
8 wpi	3	Naïve 3	ILN	1400000	63.1	45.6	11.9	47936.8
