# Supplementary material for: Meningeal lymphatic drainage promotes T cell responses against Toxoplasma gondii but is dispensable for parasite control in the brain
Source: eLife. 2022 Dec 21;11:e80775. doi: 10.7554/eLife.80775 (PMC9812409; doi:10.7554/eLife.80775)
Supplement: Figure 2—source data 2. [file elife-80775-fig2-data2.xlsx]

## Sheet: Sheet1
Timepoint	Timecourse	Sample	Tissue	Total Live Cells	TCRbeta freq	CD8 freq	CD44+CD62L- freq	Number of CD44+CD62L- CD8+ T cells			Notes
2 wpi	1	Infected 1	DCLN	362500	24.7	50.5	15	6782.47			Blanks = lymph nodes could not be identified for dissection and were excluded from analysis
2 wpi	1	Infected 2	DCLN	587500	24.9	50.5	14.7	10859.7
2 wpi	1	Infected 3	DCLN	612500	25.1	54.1	19	15802.7
2 wpi	1	Infected 4	DCLN	837500	20.7	48.4	17.5	14683.8
2 wpi	1	Infected 5	DCLN	550000	20.9	50.4	20	11587
2 wpi	1	Infected 6	DCLN	312500	23.4	49.9	16.8	6130.22
2 wpi	1	Naïve 1	DCLN	487500	62.7	46.1	2.33	3283.21
2 wpi	1	Naïve 2	DCLN
2 wpi	1	Naïve 3	DCLN	200000	60.9	43.9	1.37	732.542
2 wpi	1	Naïve 4	DCLN	337500	66.4	47	1.56	1643.1
2 wpi	2	Infected 1	DCLN	403000	24.5	52.2	22.8	11751
2 wpi	2	Infected 2	DCLN	600000	22.1	50.7	15.7	10554.8
2 wpi	2	Infected 3	DCLN	420000	20.1	53.7	14	6346.7
2 wpi	2	Infected 4	DCLN	246750	23.5	54.3	22.9	7210.42
2 wpi	2	Naïve 1	DCLN	378000	63.2	46.2	1.24	1368.59
2 wpi	2	Naïve 2	DCLN	391000	57.7	47.6	1.09	1170.54
2 wpi	2	Naïve 3	DCLN	212500	59.9	47	1.74	1040.96
3 wpi	1	Infected 1	DCLN	330000	22.8	62.3	12.3	5765.57
3 wpi	1	Infected 2	DCLN	2.04e+06	22.8	57.6	12.3	32952.8
3 wpi	1	Infected 3	DCLN	690000	23.6	61.2	15.2	15148
3 wpi	1	Infected 4	DCLN	195000	24	60.1	10.6	2981.44
3 wpi	1	Infected 5	DCLN	240000	21.1	53.7	19.1	5193.99
3 wpi	1	Infected 6	DCLN	300000	21.7	57.7	14.6	5484.15
3 wpi	1	Naïve 1	DCLN	705000	67.3	51.2	1.02	2477.85
3 wpi	1	Naïve 2	DCLN	195000	56	43.7	1.9	906.688
3 wpi	1	Naïve 3	DCLN	80000	66.1	49.7	2.35	617.612
3 wpi	3	Infected 1	DCLN	1.792e+06	23.8	57.5	17.1	41935.2
3 wpi	3	Infected 2	DCLN	2.28e+06	24.9	53.2	19.3	58291.2
3 wpi	3	Infected 3	DCLN	638000	24.8	59.8	14.8	14003.5
3 wpi	3	Infected 4	DCLN	456000	42.4	72.4	10.9	15257.9
3 wpi	3	Naïve 1	DCLN	935000	67.5	46.1	1.4	4073.28
3 wpi	3	Naïve 2	DCLN	42000	55.2	44.8	1.62	168.26
3 wpi	3	Naïve 3	DCLN	185250	59.1	43	1.19	560.223
6 wpi	1	Infected 1	DCLN	2380000	16.4	51.1	20.7	41286.9
6 wpi	1	Infected 2	DCLN	1155000	57.9	48.7	16.1	52434.3
6 wpi	1	Infected 3	DCLN	1.015e+06	22.8	62.3	11.9	17156.8
6 wpi	1	Infected 4	DCLN	3.712e+06	19.1	54.2	14.2	54566.9
6 wpi	1	Infected 5	DCLN	1798000	20.8	54.4	23.8	48420.5
6 wpi	1	Infected 6	DCLN	1.904e+06	23	51.1	24.6	55049.2
6 wpi	1	Naïve 1	DCLN	224000	60.2	50.6	1.48	1009.85
6 wpi	1	Naïve 2	DCLN	1026000	13.1	27.7	4.75	1768.45
6 wpi	1	Naïve 3	DCLN	309333	56.4	51.3	1.83	1637.85
6 wpi	1	Naïve 4	DCLN	1798000	28	39	3.33	6538.18
6 wpi	2	Infected 1	DCLN	3068000	22.2	46.9	21	67081.1
6 wpi	2	Infected 2	DCLN	2592000	21.8	52.8	7.31	21809.4
6 wpi	2	Infected 3	DCLN	784000	20.7	46.6	26.2	19814.1
6 wpi	2	Infected 4	DCLN	1428000	23.6	52.9	17.2	30663.7
6 wpi	2	Naïve 1	DCLN	126000	50.9	46.8	1.07	321.157
6 wpi	2	Naïve 2	DCLN
6 wpi	2	Naïve 3	DCLN	3068000	37.5	43.6	1.33	6671.52
6 wpi	3	Infected 1	DCLN	1.392e+06	22.3	52.7	21	34353.7
6 wpi	3	Infected 2	DCLN	4466000	20	54.3	13.3	64506
6 wpi	3	Infected 3	DCLN	2552000	18.4	52.5	19.2	47332.5
6 wpi	3	Infected 4	DCLN	1334000	20.8	46.9	17.8	23163.9
6 wpi	3	Naïve 1	DCLN	191750	56	44.1	2.5	1183.86
6 wpi	3	Naïve 2	DCLN
6 wpi	3	Naïve 3	DCLN	420500	53.5	42.3	1.3	1237.1
8 wpi	1	Infected 1	DCLN	567000	21.5	51.1	11.8	7350.63
8 wpi	1	Infected 2	DCLN	675000	19.2	49.4	21.8	13956.9
8 wpi	1	Infected 3	DCLN	2565000	22.1	46.2	16.9	44259.7
8 wpi	1	Infected 4	DCLN	855000	23	51.6	13.4	13597.2
8 wpi	1	Infected 5	DCLN	770000	26.9	54.3	18.4	20694.8
8 wpi	1	Infected 6	DCLN	348000	44.1	42.9	4.21	2771.77
8 wpi	1	Naïve 1	DCLN	224000	66.3	49.2	1.73	1264.07
8 wpi	1	Naïve 2	DCLN	3819000	71.1	37.1	0.53	5339.11
8 wpi	1	Naïve 3	DCLN	42750	59.8	46	1.33	156.404
8 wpi	1	Naïve 4	DCLN	60000	45.8	51.4	2.17	306.506
8 wpi	2	Infected 1	DCLN	2600000	21.8	48.4	18.5	50751.3
8 wpi	2	Infected 2	DCLN	2640000	18.7	40.5	19.3	38588.5
8 wpi	2	Infected 3	DCLN	3.762e+06	19.2	40.9	19.6	57902.8
8 wpi	2	Infected 4	DCLN	3604000	20.7	43.3	20.7	66867.2
8 wpi	2	Naïve 1	DCLN	143000	60.8	43.6	1.62	614.103
8 wpi	2	Naïve 2	DCLN	432000	59.9	45	1.81	2107.67
8 wpi	2	Naïve 3	DCLN	459000	57.2	41.8	2.13	2337.57
8 wpi	3	Infected 1	DCLN	6.48e+06	16.6	47.6	20	102405
8 wpi	3	Infected 2	DCLN	1350000	19.3	52.2	21.9	29785.6
8 wpi	3	Infected 3	DCLN	2214000	17.1	53.1	20.3	40809.8
8 wpi	3	Infected 4	DCLN	1320000	20	45.9	19.7	23871.7
8 wpi	3	Naïve 1	DCLN	583000	59.1	47	1.36	2202.38
8 wpi	3	Naïve 2	DCLN	206250	51.8	45.5	3.41	1657.64
8 wpi	3	Naïve 3	DCLN	936000	40.3	50.9	1.49	2860.78
2 wpi	1	Infected 1	ILN	6000000	22.1	53.8	13.3	94880.6
2 wpi	1	Infected 2	ILN	10600000	25.3	52.6	11.1	156580
2 wpi	1	Infected 3	ILN	4600000	25.8	55.3	12.4	81381.2
2 wpi	1	Infected 4	ILN	3300000	25	54.9	12.8	57974.4
2 wpi	1	Infected 5	ILN	7100000	25.5	53.4	12.2	117950
2 wpi	1	Infected 6	ILN	4300000	23.7	56.7	13.8	79740.5
2 wpi	1	Naïve 1	ILN	2900000	60.2	44.3	2.86	22118.9
2 wpi	1	Naïve 2	ILN	4800000	64.7	47.2	2.48	36352.9
2 wpi	1	Naïve 3	ILN	3200000	63.1	45.2	2.35	21447.9
2 wpi	1	Naïve 4	ILN	1700000	65.8	44	2.35	11566.3
2 wpi	2	Infected 1	ILN	10800000	22.2	54.4	11.7	152602
2 wpi	2	Infected 2	ILN	12300000	21.9	62	10.5	175360
2 wpi	2	Infected 3	ILN	8500000	25.2	59	8.46	106916
2 wpi	2	Infected 4	ILN	9700000	27.5	60.2	13.5	216788
2 wpi	2	Naïve 1	ILN	4300000	61	47.5	1.53	19062.7
2 wpi	2	Naïve 2	ILN	4700000	62.1	47.9	1.91	26702.9
2 wpi	2	Naïve 3	ILN	2200000	57.5	48.1	2.43	14785.7
3 wpi	1	Infected 1	ILN	1250000	29	55.2	9.1	18209.1
3 wpi	1	Infected 2	ILN	4400000	26.6	52.5	11.7	71891.8
3 wpi	1	Infected 3	ILN	2400000	31	59.4	12.7	56125.9
3 wpi	1	Infected 4	ILN	2150000	34.2	57.1	8.76	36779.4
3 wpi	1	Infected 5	ILN	1050000	35.7	53.3	10.7	21378.1
3 wpi	1	Infected 6	ILN	2500000	26.2	55.3	9.45	34229.3
3 wpi	1	Naïve 1	ILN	1350000	67	49	2.07	9174.34
3 wpi	1	Naïve 2	ILN	1650000	59.6	45.6	2.19	9820.63
3 wpi	1	Naïve 3	ILN	2000000	59.5	44.6	2.17	11517.1
3 wpi	3	Infected 1	ILN	6900000	29.4	54.2	13.4	147333
3 wpi	3	Infected 2	ILN
3 wpi	3	Infected 3	ILN	1225000	37.3	55.9	14.6	37291.5
3 wpi	3	Infected 4	ILN	700000	34	61.8	11.3	16620.5
3 wpi	3	Naïve 1	ILN	2900000	61.9	47.3	1.68	14264.6
3 wpi	3	Naïve 2	ILN	5100000	55.2	48.2	1.67	22660.7
3 wpi	3	Naïve 3	ILN	6400000	57.7	44.7	1.56	25750.6
6 wpi	1	Infected 1	ILN	3100000	24	48.8	14.3	51919.3
6 wpi	1	Infected 2	ILN	1950000	32.6	60.5	14.4	55382.2
6 wpi	1	Infected 3	ILN	1400000	27.6	53.6	14.5	30031
6 wpi	1	Infected 4	ILN	800000	36.2	53.4	11.3	17475
6 wpi	1	Infected 5	ILN	2900000	23.9	54.9	16.5	62784.5
6 wpi	1	Infected 6	ILN	2200000	20.9	42.1	17.3	33488.6
6 wpi	1	Naïve 1	ILN	2650000	62.9	46.6	1.72	13360.1
6 wpi	1	Naïve 2	ILN	1350000	61.6	46.1	2.21	8472.42
6 wpi	1	Naïve 3	ILN	5900000	62.6	48.1	1.41	25049
6 wpi	1	Naïve 4	ILN	5400000	64.8	46.3	1.88	30458.4
6 wpi	2	Infected 1	ILN	5900000	24.6	51.4	15.3	114141
6 wpi	2	Infected 2	ILN	2800000	32.8	46.8	6.93	29785.9
6 wpi	2	Infected 3	ILN	9400000	22.5	54.6	15	173218
6 wpi	2	Infected 4	ILN	2250000	28.7	53.2	12.2	41911.8
6 wpi	2	Naïve 1	ILN	7100000	54.8	48.7	2.6	49265.3
6 wpi	2	Naïve 2	ILN	2350000	57.5	47.5	1.31	8408.15
6 wpi	2	Naïve 3	ILN	3700000	55.6	47	0.89	8605.27
6 wpi	3	Infected 1	ILN	2600000	22.9	47.3	21.9	61675.7
6 wpi	3	Infected 2	ILN	4500000	27.2	53.1	11.9	77343.3
6 wpi	3	Infected 3	ILN	4000000	29.6	57.3	11.2	75984.4
6 wpi	3	Infected 4	ILN	4700000	22.2	51	14.8	78755.8
6 wpi	3	Naïve 1	ILN	3200000	60.1	47.6	2.21	20231.3
6 wpi	3	Naïve 2	ILN	2700000	62.8	47.7	1.72	13911.4
6 wpi	3	Naïve 3	ILN	1000000	58.5	46.9	2.75	7545.04
8 wpi	1	Infected 1	ILN	1100000	33.9	43.8	9.98	16300.4
8 wpi	1	Infected 2	ILN	575000	34.7	47.5	13.4	12699.8
8 wpi	1	Infected 3	ILN	2500000	27.3	47.7	12	39066.3
8 wpi	1	Infected 4	ILN	575000	33.9	51.4	14.9	14928.5
8 wpi	1	Infected 5	ILN	1600000	35.5	56.8	11.8	38069.6
8 wpi	1	Infected 6	ILN	2800000	31.5	51.7	13.2	60191.2
8 wpi	1	Naïve 1	ILN	3500000	49.3	43.3	1.73	12925.5
8 wpi	1	Naïve 2	ILN	2400000	46.9	44.2	2.11	10497.6
8 wpi	1	Naïve 3	ILN	3300000	41.9	46.3	1.25	8002.38
8 wpi	1	Naïve 4	ILN	625000	50.7	49.4	2.16	3381.18
8 wpi	2	Infected 1	ILN	6900000	26	51.1	14.5	132926
8 wpi	2	Infected 2	ILN	6700000	30.3	51.5	14.1	147416
8 wpi	2	Infected 3	ILN	8700000	23.8	47	21.2	206315
8 wpi	2	Infected 4	ILN	6400000	34	45.3	14.3	140959
8 wpi	2	Naïve 1	ILN	8400000	54.4	43.7	1.56	31151.9
8 wpi	2	Naïve 2	ILN	5100000	58.4	47.3	2.01	28316.5
8 wpi	2	Naïve 3	ILN	5800000	59.3	47.2	1.91	31006.9
8 wpi	3	Infected 1	ILN	2300000	25.3	50.5	17.2	50543.8
8 wpi	3	Infected 2	ILN	6300000	28.4	50.2	16.1	144607
8 wpi	3	Infected 3	ILN	10600000	24.5	55.9	12.2	177110
8 wpi	3	Infected 4	ILN	7400000	29.5	48.4	10.5	110940
8 wpi	3	Naïve 1	ILN	2800000	67.3	48.7	2.61	23952
8 wpi	3	Naïve 2	ILN	2600000	65.6	49	1.62	13539.1
8 wpi	3	Naïve 3	ILN	1400000	63.5	52.2	1.67	7749.77
