# Supplementary material for: Meningeal lymphatic drainage promotes T cell responses against Toxoplasma gondii but is dispensable for parasite control in the brain
Source: eLife. 2022 Dec 21;11:e80775. doi: 10.7554/eLife.80775 (PMC9812409; doi:10.7554/eLife.80775)
Supplement: Figure 2—source data 3. [file elife-80775-fig2-data3.xlsx]

## Sheet: Sheet 1
Timepoint	Timecourse	Sample	Tissue	Total Live Cells	TCRbeta freq	CD8 freq	Tetramer+ freq	Number of CD8+ T cells	Number of SIINFEKL-specific CD8+ T cells
2 wpi	1	1	DCLN	400000	16.4	44.2	1.04	28995.2	301.55
2 wpi	1	2	DCLN	200000	17.8	34.8	3.05	12388.8	377.858
2 wpi	1	3	DCLN	350000	20.7	38.6	2.21	27965.7	618.042
2 wpi	2	1	DCLN	350000	24.4	52	0.97	44408	430.758
2 wpi	2	2	DCLN	450000	21.2	47.6	1.2	45410.4	544.925
2 wpi	2	3	DCLN	200000	19.2	42.7	0.98	16396.8	160.689
2 wpi	2	4	DCLN	950000	25	39.5	0.7	93812.5	656.688
3 wpi	1	1	DCLN	320000	31.4	65.4	1.03	65713.9	676.853
3 wpi	1	2	DCLN	120000	22.4	49.7	2.36	13359.4	315.281
3 wpi	1	3	DCLN	360000	19.9	51.4	1.83	36823	673.86
3 wpi	2	1	DCLN	250000	25.4	57.2	0.68	36322	246.99
3 wpi	2	2	DCLN	1350000	18.7	47.6	1.12	120166	1345.86
3 wpi	2	3	DCLN	200000	20.9	56.7	1.49	23700.6	353.139
3 wpi	2	4	DCLN	350000	19.4	38.5	1.8	26141.5	470.547
6 wpi	1	1	DCLN	1320000	25.4	50.4	1.39	168981	2348.84
6 wpi	1	2	DCLN	3640000	19.3	54.2	1.5	380766	5711.49
6 wpi	1	3	DCLN	920000	19	46.5	1.1	81282	894.102
6 wpi	2	1	DCLN	1240000	27.2	46.6	0.39	157172	612.973
6 wpi	2	2	DCLN	1280000	6.99	50.7	10.2	45362.3	4626.96
6 wpi	2	3	DCLN	3080000	16.9	51.2	0.34	266506	906.121
6 wpi	2	4	DCLN	2600000	24.3	50.4	0.69	318427	2197.15
8 wpi	1	1	DCLN	1800000	28.7	46.7	0.67	241252	1616.39
8 wpi	1	2	DCLN	240000	25.8	43.9	0.91	27182.9	247.364
8 wpi	1	3	DCLN	1320000	30.3	39.7	0.48	158784	762.164
8 wpi	2	1	DCLN	1000000	23.3	22.1	0.6	51493	308.958
8 wpi	2	2	DCLN	260000	24.4	24.6	0.2	15606.2	31.2125
8 wpi	2	3	DCLN	1120000	28.9	20.2	0.19	65383.4	124.228
8 wpi	2	4	DCLN	840000	50.4	24.9	0.26	105417	274.083
2 wpi	1	1	ILN	4300000	22.8	55.1	0.92	540200	4969.84
2 wpi	1	2	ILN	3900000	21.4	52.6	0.92	439000	4038.8
2 wpi	1	3	ILN	4800000	22.1	51.3	0.68	544190	3700.49
2 wpi	2	1	ILN	2750000	23.7	51.5	0.66	335651	2215.3
2 wpi	2	2	ILN	3750000	21	52.3	0.5	411862	2059.31
2 wpi	2	3	ILN	7800000	17.8	39.4	0.43	547030	2352.23
2 wpi	2	4	ILN	6000000	26.7	42.6	0.46	682452	3139.28
3 wpi	1	1	ILN	2000000	41	66.9	0.74	548580	4059.49
3 wpi	1	2	ILN	1600000	35	58.3	1.28	326480	4178.94
3 wpi	1	3	ILN	5700000	29.5	55.8	1.13	938277	10602.5
3 wpi	2	1	ILN	2700000	30.1	47.7	0.78	387658	3023.73
3 wpi	2	2	ILN	11600000	23.4	42.3	0.89	1.14819e+06	10218.9
3 wpi	2	3	ILN	2800000	25.1	49.9	0.79	350697	2770.51
3 wpi	2	4	ILN	10200000	24.2	41	0.83	1012044	8399.97
6 wpi	1	1	ILN	275000	30.2	54.2	1.48	45013.1	666.194
6 wpi	1	2	ILN	316667	45.7	53.9	0.84	78002.3	655.219
6 wpi	1	3	ILN	400000	36.5	50.8	1.16	74168	860.349
6 wpi	2	1	ILN	6720000	36.2	46.3	0.31	1.12631e+06	3491.57
6 wpi	2	2	ILN	1.86e+06	35.1	54.1	0.65	353197	2295.78
6 wpi	2	3	ILN	2280000	28	49.5	0.31	316008	979.625
6 wpi	2	4	ILN	3300000	34.3	50.6	0.6	572741	3436.45
8 wpi	1	1	ILN	1880000	44.7	45.6	0.29	383204	1111.29
8 wpi	1	2	ILN	800000	55.5	47	0.41	208680	855.588
8 wpi	1	3	ILN	8640000	38.8	45.5	0.34	1.52531e+06	5186.04
8 wpi	2	1	ILN	8640000	31	18.2	0.45	487469	2193.61
8 wpi	2	2	ILN	4800000	25.9	18.3	0.31	227506	705.267
8 wpi	2	3	ILN	5.76e+06	25.3	18.6	0.38	271054	1030.01
8 wpi	2	4	ILN	4.08e+06	23.6	20.7	0.34	199316	677.675
