# Supplementary material for: Meningeal lymphatic drainage promotes T cell responses against Toxoplasma gondii but is dispensable for parasite control in the brain
Source: eLife. 2022 Dec 21;11:e80775. doi: 10.7554/eLife.80775 (PMC9812409; doi:10.7554/eLife.80775)
Supplement: Figure 2—source data 4. [file elife-80775-fig2-data4.xlsx]

## Sheet: Experiment 1
Sample	Trial	Timepoint	Tissue	Animal	Cq	Concentration (gc/rxn)	ng gDNA / rxn	GC per 1 ug gDNA		Limit of detection = 6 GC / ug
1 wpi - A1 - Brain	1	1 wpi	Brain	A1	37.7963	0.0813037	500	0.162607
1 wpi - A2 - Brain	1	1 wpi	Brain	A2	39.7901	0.024267	500	0.0485339
1 wpi - A3 - Brain	1	1 wpi	Brain	A3	35.1112	0.414254	500	0.828508
1 wpi - A1 - DCLN	1	1 wpi	DCLN	A1	32.3864	2.16223	288.711	7.48926
1 wpi - A2 - DCLN	1	1 wpi	DCLN	A2	34.8407	0.488121	308.754	1.58094
1 wpi - A3 - DCLN	1	1 wpi	DCLN	A3	33.4317	1.14707	298.443	3.84352
1 wpi - A1 - Dura	1	1 wpi	Dura	A1	38.4413	0.0549846	500	0.109969
1 wpi - A2 - Dura	1	1 wpi	Dura	A2	36.6034	0.167601	500	0.335203
1 wpi - A3 - Dura	1	1 wpi	Dura	A3	34.7553	0.514051	500	1.0281
1 wpi - A1 - ILN	1	1 wpi	ILN	A1	31.8966	2.91008	438.141	6.64188
1 wpi - A2 - ILN	1	1 wpi	ILN	A2	27.5367	40.9395	461.066	88.7931
1 wpi - A3 - ILN	1	1 wpi	ILN	A3	29.1733	15.1748	500	30.3495
1 wpi - A1 - Quadriceps	1	1 wpi	Quadriceps	A1	35.8937	0.257743	199.07	1.29473
1 wpi - A2 - Quadriceps	1	1 wpi	Quadriceps	A2	Undetected	0	222.505	0
1 wpi - A1 - Subcut	1	1 wpi	Subcut	A1	31.7506	3.17942	500	6.35884
1 wpi - A2 - Subcut	1	1 wpi	Subcut	A2	32.4691	2.05647	500	4.11293
1 wpi - A3 - Subcut	1	1 wpi	Subcut	A3	32.6046	1.89417	500	3.78833
2 wpi - A1 - Brain	1	2 wpi	Brain	A1	30.789	5.69632	500	11.3926
2 wpi - A2 - Brain	1	2 wpi	Brain	A2	29.8901	9.82527	500	19.6505
2 wpi - A3 - Brain	1	2 wpi	Brain	A3	29.5997	11.7171	500	23.4341
2 wpi - A1 - DCLN	1	2 wpi	DCLN	A1	33.4349	1.14489	500	2.28977
2 wpi - A2 - DCLN	1	2 wpi	DCLN	A2	32.7236	1.76238	500	3.52475
2 wpi - A3 - DCLN	1	2 wpi	DCLN	A3	Undetected	0	500	0
2 wpi - A1 - Dura	1	2 wpi	Dura	A1	34.0921	0.768553	500	1.53711
2 wpi - A2 - Dura	1	2 wpi	Dura	A2	38.7875	0.0445723	500	0.0891446
2 wpi - A3 - Dura	1	2 wpi	Dura	A3	Undetected	0	500	0
2 wpi - A1 - ILN	1	2 wpi	ILN	A1	34.0303	0.797906	500	1.59581
2 wpi - A3 - ILN	1	2 wpi	ILN	A3	31.0017	5.00713	500	10.0143
2 wpi - A1 - Quadriceps	1	2 wpi	Quadriceps	A1	32.8438	1.63846	500	3.27692
2 wpi - A2 - Quadriceps	1	2 wpi	Quadriceps	A2	36.4419	0.184849	500	0.369698
2 wpi - A3 - Quadriceps	1	2 wpi	Quadriceps	A3	34.4273	0.627184	500	1.25437
2 wpi - A1 - Subcut	1	2 wpi	Subcut	A1	33.5516	1.06665	500	2.1333
2 wpi - A2 - Subcut	1	2 wpi	Subcut	A2	37.8068	0.0807868	500	0.161574
2 wpi - A3 - Subcut	1	2 wpi	Subcut	A3	31.6974	3.28361	500	6.56723
3 wpi - A1 - Brain	1	3 wpi	Brain	A1	29.4714	12.6649	500	25.3298
3 wpi - A2 - Brain	1	3 wpi	Brain	A2	30.5327	6.65414	500	13.3083
3 wpi - A3 - Brain	1	3 wpi	Brain	A3	28.4167	24.0088	500	48.0177
3 wpi - A1 - DCLN	1	3 wpi	DCLN	A1	31.6677	3.34334	500	6.68668
3 wpi - A2 - DCLN	1	3 wpi	DCLN	A2	37.8812	0.0772247	500	0.154449
3 wpi - A3 - DCLN	1	3 wpi	DCLN	A3	Undetected	0	317.577	0
3 wpi - A1 - Dura	1	3 wpi	Dura	A1	34.0024	0.811522	500	1.62304
3 wpi - A2 - Dura	1	3 wpi	Dura	A2	37.1289	0.121866	500	0.243732
3 wpi - A3 - Dura	1	3 wpi	Dura	A3	31.5467	3.59793	500	7.19586
3 wpi - A1 - ILN	1	3 wpi	ILN	A1	33.4621	1.12615	500	2.25231
3 wpi - A2 - ILN	1	3 wpi	ILN	A2	35.0069	0.441304	500	0.882607
3 wpi - A3 - ILN	1	3 wpi	ILN	A3	33.1838	1.33319	500	2.66637
3 wpi - A1 - Quadriceps	1	3 wpi	Quadriceps	A1	34.3543	0.655555	500	1.31111
3 wpi - A2 - Quadriceps	1	3 wpi	Quadriceps	A2	36.1611	0.219159	500	0.438318
3 wpi - A3 - Quadriceps	1	3 wpi	Quadriceps	A3	36.3852	0.191317	500	0.382633
3 wpi - A1 - Subcut	1	3 wpi	Subcut	A1	36.7331	0.154929	500	0.309858
3 wpi - A2 - Subcut	1	3 wpi	Subcut	A2	33.6317	1.01606	500	2.03213
3 wpi - A3 - Subcut	1	3 wpi	Subcut	A3	36.3417	0.196435	500	0.392869
6 wpi - A1 - Brain	1	6 wpi	Brain	A1	29.9766	9.3228	500	18.6456
6 wpi - A2 - Brain	1	6 wpi	Brain	A2	30.3118	7.60809	500	15.2162
6 wpi - A3 - Brain	1	6 wpi	Brain	A3	29.3457	13.668	500	27.3359
6 wpi - A1 - DCLN	1	6 wpi	DCLN	A1	Undetected	0	370.863	0
6 wpi - A2 - DCLN	1	6 wpi	DCLN	A2	Undetected	0	302.464	0
6 wpi - A3 - DCLN	1	6 wpi	DCLN	A3	Undetected	0	500	0
6 wpi - A1 - Dura	1	6 wpi	Dura	A1	39.0049	0.039068	500	0.078136
6 wpi - A2 - Dura	1	6 wpi	Dura	A2	36.6218	0.165743	500	0.331485
6 wpi - A3 - Dura	1	6 wpi	Dura	A3	37.312	0.109056	500	0.218111
6 wpi - A1 - ILN	1	6 wpi	ILN	A1	39.6046	0.0271559	500	0.0543118
6 wpi - A2 - ILN	1	6 wpi	ILN	A2	Undetected	0	500	0
6 wpi - A3 - ILN	1	6 wpi	ILN	A3	Undetected	0	500	0
6 wpi - A1 - Quadriceps	1	6 wpi	Quadriceps	A1	37.3398	0.107239	500	0.214478
6 wpi - A2 - Quadriceps	1	6 wpi	Quadriceps	A2	35.609	0.306312	500	0.612624
6 wpi - A3 - Quadriceps	1	6 wpi	Quadriceps	A3	33.8951	0.866056	500	1.73211
6 wpi - A1 - Subcut	1	6 wpi	Subcut	A1	38.2338	0.0623564	500	0.124713
6 wpi - A2 - Subcut	1	6 wpi	Subcut	A2	Undetected	0	500	0
6 wpi - A3 - Subcut	1	6 wpi	Subcut	A3	Undetected	0	500	0

## Sheet: Experiment 2
Sample	Trial	Timepoint	Tissue	Animal	Cq	Concentration (gc/rxn)	ng gDNA / rxn	GC per 1 ug gDNA		Limit of detection = 6 GC / ug
1 wpi - B1 - Brain	2	1 wpi	Brain	B1	33.6443	0.585996	500	1.17199
1 wpi - B2 - Brain	2	1 wpi	Brain	B2	35.1818	0.208819	500	0.417638
1 wpi - B3 - Brain	2	1 wpi	Brain	B3	37.1754	0.0547893	500	0.109579
1 wpi - B1 - DCLN	2	1 wpi	DCLN	B1	30.4689	4.93656	496.63	9.94012
1 wpi - B2 - DCLN	2	1 wpi	DCLN	B2	35.6753	0.149946	236.377	0.634351
1 wpi - B3 - DCLN	2	1 wpi	DCLN	B3	30.663	4.33367	223.38	19.4005
1 wpi - B1 - Dura	2	1 wpi	Dura	B1	37.0564	0.0593448	500	0.11869
1 wpi - B2 - Dura	2	1 wpi	Dura	B2	38.3069	0.0256395	500	0.051279
1 wpi - B3 - Dura	2	1 wpi	Dura	B3	34.0148	0.457011	500	0.914022
1 wpi - B1 - ILN	2	1 wpi	ILN	B1	30.9213	3.64404	339.77	10.725
1 wpi - B2 - ILN	2	1 wpi	ILN	B2	31.3719	2.69304	403.827	6.66881
1 wpi - B3 - ILN	2	1 wpi	ILN	B3	27.3408	40.2893	500	80.5786
1 wpi - B1 - Quadriceps	2	1 wpi	Quadriceps	B1	31.2106	3.00096	500	6.00193
1 wpi - B2 - Quadriceps	2	1 wpi	Quadriceps	B2	32.3318	1.41401	500	2.82802
1 wpi - B3 - Quadriceps	2	1 wpi	Quadriceps	B3	32.6264	1.16035	500	2.3207
1 wpi - B1 - Subcut	2	1 wpi	Subcut	B1	30.6827	4.27689	500	8.55377
1 wpi - B2 - Subcut	2	1 wpi	Subcut	B2	31.1837	3.05547	500	6.11095
1 wpi - B3 - Subcut	2	1 wpi	Subcut	B3	29.6305	8.66554	413.584	20.9523
2 wpi - B1 - Brain	2	2 wpi	Brain	B1	30.1012	6.3183	500	12.6366
2 wpi - B2 - Brain	2	2 wpi	Brain	B2	30.4137	5.12285	500	10.2457
2 wpi - B3 - Brain	2	2 wpi	Brain	B3	31.4299	2.59019	500	5.18038
2 wpi - B1 - DCLN	2	2 wpi	DCLN	B1	29.9312	7.08189	500	14.1638
2 wpi - B2 - DCLN	2	2 wpi	DCLN	B2	31.7249	2.125	500	4.25001
2 wpi - B3 - DCLN	2	2 wpi	DCLN	B3	31.7658	2.06745	500	4.13489
2 wpi - B1 - Dura	2	2 wpi	Dura	B1	31.3357	2.75925	500	5.5185
2 wpi - B2 - Dura	2	2 wpi	Dura	B2	35.7076	0.146727	500	0.293455
2 wpi - B3 - Dura	2	2 wpi	Dura	B3	33.0684	0.862482	500	1.72496
2 wpi - B1 - ILN	2	2 wpi	ILN	B1	29.483	9.56758	500	19.1352
2 wpi - B2 - ILN	2	2 wpi	ILN	B2	32.4321	1.32196	500	2.64393
2 wpi - B3 - ILN	2	2 wpi	ILN	B3	33.347	0.7154	500	1.4308
2 wpi - B1 - Quadriceps	2	2 wpi	Quadriceps	B1	32.7479	1.06947	500	2.13894
2 wpi - B2 - Quadriceps	2	2 wpi	Quadriceps	B2	33.9077	0.491067	500	0.982134
2 wpi - B3 - Quadriceps	2	2 wpi	Quadriceps	B3	37.2405	0.052447	500	0.104894
2 wpi - B1 - Subcut	2	2 wpi	Subcut	B1	30.3677	5.28347	500	10.5669
2 wpi - B2 - Subcut	2	2 wpi	Subcut	B2	32.7853	1.04296	500	2.08591
2 wpi - B3 - Subcut	2	2 wpi	Subcut	B3	33.2513	0.762859	500	1.52572
3 wpi - B1 - Brain	2	3 wpi	Brain	B1	28.1741	23.0304	500	46.0607
3 wpi - B2 - Brain	2	3 wpi	Brain	B2	29.1472	11.9862	500	23.9724
3 wpi - B3 - Brain	2	3 wpi	Brain	B3	30.8738	3.76189	500	7.52377
3 wpi - B1 - DCLN	2	3 wpi	DCLN	B1	38.8033	0.0183742	500	0.0367485
3 wpi - B2 - DCLN	2	3 wpi	DCLN	B2	32.9987	0.903806	500	1.80761
3 wpi - B3 - DCLN	2	3 wpi	DCLN	B3	Undetected	0	222.403	0
3 wpi - B1 - Dura	2	3 wpi	Dura	B1	35.0285	0.231452	500	0.462904
3 wpi - B2 - Dura	2	3 wpi	Dura	B2	35.3514	0.186348	500	0.372697
3 wpi - B3 - Dura	2	3 wpi	Dura	B3	35.4591	0.173364	500	0.346729
3 wpi - B1 - ILN	2	3 wpi	ILN	B1	33.5921	0.606884	500	1.21377
3 wpi - B2 - ILN	2	3 wpi	ILN	B2	38.2113	0.0273373	500	0.0546747
3 wpi - B3 - ILN	2	3 wpi	ILN	B3	34.3707	0.359903	500	0.719806
3 wpi - B1 - Quadriceps	2	3 wpi	Quadriceps	B1	30.7126	4.19175	500	8.38349
3 wpi - B2 - Quadriceps	2	3 wpi	Quadriceps	B2	36.2674	0.100775	500	0.201549
3 wpi - B3 - Quadriceps	2	3 wpi	Quadriceps	B3	31.4398	2.57311	500	5.14621
3 wpi - B1 - Subcut	2	3 wpi	Subcut	B1	34.8591	0.259308	500	0.518615
3 wpi - B2 - Subcut	2	3 wpi	Subcut	B2	Undetected	0	500	0
3 wpi - B3 - Subcut	2	3 wpi	Subcut	B3	38.7678	0.0188178	500	0.0376356
6 wpi - B1 - Brain	2	6 wpi	Brain	B1	28.7246	15.9164	500	31.8328
6 wpi - B2 - Brain	2	6 wpi	Brain	B2	28.2136	22.4275	500	44.855
6 wpi - B3 - Brain	2	6 wpi	Brain	B3	28.2062	22.5394	500	45.0787
6 wpi - B1 - DCLN	2	6 wpi	DCLN	B1	Undetected	0	500	0
6 wpi - B2 - DCLN	2	6 wpi	DCLN	B2	Undetected	0	444.524	0
6 wpi - B3 - DCLN	2	6 wpi	DCLN	B3	Undetected	0	380.911	0
6 wpi - B1 - Dura	2	6 wpi	Dura	B1	38.043	0.0306062	500	0.0612124
6 wpi - B2 - Dura	2	6 wpi	Dura	B2	Undetected	0	452.081	0
6 wpi - B3 - Dura	2	6 wpi	Dura	B3	34.7743	0.274494	500	0.548989
6 wpi - B1 - ILN	2	6 wpi	ILN	B1	Undetected	0	500	0
6 wpi - B2 - ILN	2	6 wpi	ILN	B2	38.7558	0.0189698	500	0.0379396
6 wpi - B3 - ILN	2	6 wpi	ILN	B3	Undetected	0	500	0
6 wpi - B1 - Quadriceps	2	6 wpi	Quadriceps	B1	31.2529	2.91698	500	5.83395
6 wpi - B2 - Quadriceps	2	6 wpi	Quadriceps	B2	37.3648	0.0482484	500	0.0964968
6 wpi - B3 - Quadriceps	2	6 wpi	Quadriceps	B3	35.1496	0.213388	500	0.426775
6 wpi - B1 - Subcut	2	6 wpi	Subcut	B1	Undetected	0	500	0
6 wpi - B2 - Subcut	2	6 wpi	Subcut	B2	Undetected	0	500	0
6 wpi - B3 - Subcut	2	6 wpi	Subcut	B3	35.9757	0.12257	500	0.245139

## Sheet: Standards for Exp 1
Well	GC per rxn	Animal	Cq	Average Cq			Conc (genomes/rxn)	Log (Conc)	Cq		Regression
Standard - 30,000	30,000	Standard	15.303	16.1841			30,000	4.47712	16.1841		Cq = (-3.797)(log(conc.)) + 33.658
Standard - 30,000	30,000	Standard	17.0652				3,000	3.47712	21.0122		Log(conc.) = (Cq-33.658)/(-3.797)
Standard - 3,000	3,000	Standard	20.9473	21.0122			300	2.47712	24.5832		Conc = 10^((Cq-33.658)/(-3.797))
Standard - 3,000	3,000	Standard	21.0771				30	1.47712	27.6133
Standard - 300	300	Standard	24.5067	24.5832			3	0.477121	31.8688
Standard - 300	300	Standard	24.6598
Standard - 30	30	Standard	27.2752	27.6133
Standard - 30	30	Standard	27.9515
Standard - 3	3	Standard	31.8688	31.8688
Standard - 3	3	Standard	30.9417
NTC	0	Blank	39.7909

## Sheet: Standards for Exp 2
Well	GC per rxn	Animal	Cq	Average Cq			Conc (genomes/rxn)	Log (Conc)	Cq		Regression
Standard - 30,000	30,000	Standard	18.5971	17.8801	17.8801		30,000	4.47712	17.8801		Cq = (-3.4309)(log(conc.)) + 32.848
Standard - 30,000	30,000	Standard	17.1632				3,000	3.47712	20.5292		Log(conc.) = (Cq-32.848)/(-3.4309)
Standard - 3,000	3,000	Standard	20.3564	20.5292	20.5292		300	2.47712	24.2488		Conc = 10^((Cq-32.848)/(-3.4309))
Standard - 3,000	3,000	Standard	20.7021				30	1.47712	27.5777
Standard - 300	300	Standard	24.2056	24.2488	24.2488		3	0.477121	31.5106
Standard - 300	300	Standard	24.2921
Standard - 30	30	Standard	27.5991	27.5777	27.5777
Standard - 30	30	Standard	27.5562
Standard - 3	3	Standard	31.5106	31.5106	31.5106
Standard - 3	3	Standard	30.9572
NTC	0	Blank
									0
									0	60
									0	60
									0	60
									0	60
									0	60
									0	60
									0	60
									0	60
									0	60
									0	60
										60
